# Supplementary material for: The Arabidopsis LRR-RLK, PXC1, is a regulator of secondary wall formation correlated with the TDIF-PXY/TDR-WOX4 signaling pathway
Source: PubMed Central journal article supplement (PMC3716795; doi:10.1186/1471-2229-13-94), 2013-07-01
Supplement: 1471-2229-13-94-S2.pdf [file 1471-2229-13-94-S2.pdf]

| Subgroups  | AGI Id    | Clusters |
|------------|-----------|----------|
| LRR-I      | AT1G67720 | 0        |
| LRR-II     | AT3G25560 | 0        |
| LRR-III    | AT5G58300 | 0        |
| LRR-Xb     | AT2G01950 | 0        |
| LRR-XI     | AT4G20270 | 0        |
| LRR-I      | AT1G51805 | 1        |
| LRR-I      | AT5G59670 | 1        |
| LRR-XII    | AT1G35710 | 1        |
| LRR-XII    | AT3G47090 | 1        |
| LRR-XII    | AT3G47580 | 1        |
| LRR-XII    | AT5G20480 | 1        |
| LRR-XII    | AT5G46330 | 1        |
| LRR-XI     | AT4G28490 | 2        |
| LRR-XII Ib | AT5G62230 | 2        |
| LRR-III    | AT3G56100 | 5        |
| LRR-III    | AT5G67200 | 5        |
| LRR-III    | AT3G02880 | 9        |
| LRR-II     | AT5G16000 | 10       |
| LRR-VIb    | AT1G63430 | 10       |
| LRR-IX     | AT1G66150 | 10       |
| LRR-IX     | AT3G23750 | 10       |
| LRR-Xb     | AT4G39400 | 10       |
| LRR-XI     | AT1G28440 | 10       |
| LRR-III    | AT2G07040 | 11       |
| LRR-III    | AT3G20190 | 11       |
| LRR-I      | AT1G51860 | 14       |
| LRR-I      | AT1G51880 | 16       |
| LRR-I      | AT2G28970 | 16       |
| LRR-I      | AT2G28990 | 16       |
| LRR-III    | AT1G64210 | 16       |
| LRR-III    | AT2G15300 | 16       |
| LRR-III    | AT5G24100 | 16       |
| LRR-VIIIb  | AT1G29730 | 22       |
| LRR-VIIIb  | AT1G29740 | 22       |
| LRR-VIIIb  | AT1G53420 | 22       |
| LRR-III    | AT5G07620 | 23       |
| LRR-III    | AT3G50230 | 26       |
| LRR-Via    | AT1G14390 | 26       |
| LRR-XI     | AT5G44700 | 27       |
| LRR-V      | AT3G14350 | 28       |
| LRR-Xb     | AT1G72300 | 28       |
| LRR-I      | AT4G29990 | 30       |
| LRR-V      | AT5G06820 | 30       |
| LRR-VII    | AT3G28040 | 31       |
| LRR-XII Ib | AT5G07180 | 31       |
| LRR-I      | AT2G04300 | 32       |
| LRR-III    | AT1G68400 | 32       |
| LRR-III    | AT1G75640 | 32       |
| LRR-III    | AT2G01210 | 32       |
| LRR-Xb     | AT5G42440 | 34       |
| LRR-XI     | AT5G65710 | 34       |
| LRR-III    | AT1G67510 | 35       |
| LRR-VIb    | AT4G18640 | 35       |

|           |           |     |
|-----------|-----------|-----|
| LRR-VIIIa | AT1G79620 | 35  |
| LRR-I     | AT2G29000 | 36  |
| LRR-I     | AT3G46340 | 36  |
| LRR-I     | AT3G46350 | 36  |
| LRR-III   | AT5G20690 | 40  |
| LRR-V     | AT1G78980 | 40  |
| LRR-II    | AT1G34210 | 47  |
| LRR-II    | AT1G60800 | 47  |
| LRR-III   | AT2G26730 | 47  |
| LRR-I     | AT4G29450 | 50  |
| LRR-III   | AT5G35390 | 50  |
| LRR-I     | AT2G14440 | 56  |
| LRR-I     | AT2G14510 | 56  |
| LRR-I     | AT3G46330 | 56  |
| LRR-I     | AT5G59680 | 56  |
| LRR-VIIIa | AT5G37450 | 56  |
| LRR-VIIIa | AT5G49770 | 56  |
| LRR-VIIIa | AT5G49780 | 56  |
| LRR-XII   | AT2G24130 | 56  |
| LRR-XIIa  | AT1G78530 | 57  |
| LRR-Xa    | AT3G28450 | 58  |
| LRR-XI    | AT5G25930 | 58  |
| LRR-I     | AT4G20450 | 59  |
| LRR-I     | AT4G29180 | 59  |
| LRR-II    | AT4G33430 | 63  |
| LRR-VIIIb | AT1G16670 | 63  |
| LRR-Xb    | AT2G02220 | 63  |
| LRR-XI    | AT5G56040 | 68  |
| LRR-XI    | AT1G73080 | 69  |
| LRR-III   | AT5G05160 | 72  |
| LRR-IV    | AT2G25790 | 72  |
| LRR-IV    | AT4G22730 | 72  |
| LRR-V     | AT2G20850 | 72  |
| LRR-XII   | AT3G47570 | 72  |
| LRR-VIIIb | AT1G29750 | 78  |
| LRR-VIIIa | AT5G01950 | 79  |
| LRR-VIIIb | AT1G07650 | 79  |
| LRR-VIIIb | AT1G53440 | 79  |
| LRR-XI    | AT1G34110 | 82  |
| LRR-VIIIb | AT3G14840 | 85  |
| LRR-XII   | AT3G47110 | 88  |
| LRR-III   | AT4G31250 | 89  |
| LRR-I     | AT1G51810 | 90  |
| LRR-XII   | AT5G39390 | 90  |
| LRR-II    | AT1G71830 | 96  |
| LRR-III   | AT3G08680 | 96  |
| LRR-III   | AT3G17840 | 96  |
| LRR-III   | AT4G36180 | 96  |
| LRR-III   | AT5G10020 | 96  |
| LRR-IV    | AT5G51560 | 96  |
| LRR-VII   | AT3G56370 | 96  |
| LRR-VII   | AT5G01890 | 96  |
| LRR-I     | AT1G05700 | 100 |
| LRR-I     | AT1G07560 | 100 |

|           |           |     |
|-----------|-----------|-----|
| LRR-I     | AT1G51830 | 100 |
| LRR-I     | AT2G28960 | 100 |
| LRR-XI    | AT5G63930 | 100 |
| LRR-II    | AT5G63710 | 107 |
| LRR-XI    | AT1G17750 | 107 |
| LRR-XI    | AT5G49660 | 107 |
| LRR-I     | AT5G48740 | 108 |
| LRR-I     | AT2G19190 | 112 |
| LRR-Xa    | AT1G69990 | 112 |
| LRR-III   | AT1G50610 | 113 |
| LRR-III   | AT1G72460 | 113 |
| LRR-III   | AT3G42880 | 113 |
| LRR-VIIIb | AT1G29720 | 117 |
| LRR-I     | AT5G59650 | 118 |
| LRR-II    | AT4G30520 | 122 |
| LRR-I     | AT1G51790 | 126 |
| LRR-I     | AT1G51800 | 126 |
| LRR-I     | AT1G51850 | 126 |
| LRR-XI    | AT1G34420 | 126 |
| LRR-XIV   | AT4G39270 | 133 |
| LRR-I     | AT3G21340 | 138 |
| LRR-I     | AT3G46400 | 138 |
| LRR-IX    | AT2G01820 | 142 |
| LRR-VII   | AT2G24230 | 144 |
| LRR-XIIIa | AT2G35620 | 144 |
| LRR-XI    | AT3G24240 | 146 |
| LRR-XI    | AT5G48940 | 146 |
| LRR-IX    | AT1G24650 | 148 |
| LRR-III   | AT3G51740 | 149 |
| LRR-II    | AT2G23950 | 150 |
| LRR-II    | AT5G45780 | 150 |
| LRR-III   | AT4G37250 | 150 |
| LRR-III   | AT1G48480 | 152 |
| LRR-III   | AT5G67280 | 152 |
| LRR-IV    | AT2G45340 | 152 |
| LRR-VIIIa | AT3G53590 | 153 |
| LRR-XI    | AT3G19700 | 153 |
| LRR-I     | AT5G59660 | 155 |
| LRR-VI-1  | AT5G63410 | 157 |
| LRR-XII   | AT4G08850 | 158 |
| LRR-XV    | AT1G69270 | 158 |
| LRR-III   | AT1G60630 | 163 |
| LRR-III   | AT2G23300 | 163 |
| LRR-III   | AT3G57830 | 163 |
| LRR-XI    | AT5G06940 | 163 |
| LRR-XIIIa | AT5G62710 | 163 |
| LRR-XIIIb | AT2G26330 | 163 |
| LRR-I     | AT1G51620 | 165 |
| LRR-I     | AT1G51820 | 165 |
| LRR-I     | AT1G51890 | 165 |
| LRR-VIIIb | AT3G09010 | 165 |
| LRR-Xb    | AT1G74360 | 165 |
| LRR-I     | AT3G46370 | 171 |
| LRR-VIb   | AT5G58540 | 172 |

|           |           |     |
|-----------|-----------|-----|
| LRR-I     | AT2G19210 | 173 |
| LRR-III   | AT1G66830 | 173 |
| LRR-I     | AT1G07550 | 177 |
| LRR-VIa   | AT3G03770 | 180 |
| LRR-Xa    | AT1G27190 | 180 |
| LRR-XIIIa | AT1G31420 | 180 |
| LRR-I     | AT1G49100 | 181 |
| LRR-I     | AT1G51910 | 181 |
| LRR-I     | AT2G19230 | 181 |
| LRR-I     | AT5G15730 | 182 |
| LRR-II    | AT5G10290 | 182 |
| LRR-II    | AT5G65240 | 182 |
| LRR-VIIIa | AT1G06840 | 182 |
| LRR-VIIIb | AT1G56145 | 182 |
| LRR-VI-1  | AT2G02780 | 183 |
| LRR-XI    | AT1G08590 | 183 |
| LRR-XI    | AT4G28650 | 183 |
| LRR-VIIIb | AT1G56120 | 184 |
| LRR-VIIIb | AT1G56130 | 184 |
| LRR-VIIIb | AT1G56140 | 184 |
| LRR-XI    | AT1G09970 | 184 |
| LRR-XI    | AT4G20140 | 186 |
| LRR-XI    | AT1G75820 | 187 |
| LRR-XI    | AT2G33170 | 187 |
| LRR-Xa    | AT5G48380 | 188 |
| LRR-III   | AT2G36570 | 190 |
| LRR-XI    | AT5G65700 | 190 |
| LRR-XI    | AT1G72180 | 192 |
| LRR-III   | AT4G34220 | 204 |
| LRR-XI    | AT3G49670 | 204 |
| LRR-I     | AT2G37050 | 206 |
| LRR-III   | AT3G24660 | 206 |
| LRR-III   | AT5G53320 | 206 |
| LRR-VIb   | AT5G41180 | 206 |
| LRR-Xb    | AT1G55610 | 206 |
| LRR-Xb    | AT3G13380 | 206 |
| LRR-Xb    | AT5G53890 | 206 |
| LRR-XI    | AT2G41820 | 206 |
| LRR-XI    | AT5G61480 | 206 |
| LRR-XIV   | AT5G51350 | 206 |
| LRR-V     | AT4G22130 | 209 |
| LRR-VIb   | AT3G56050 | 212 |
| LRR-VII   | AT5G45800 | 212 |
| LRR-I     | AT5G54590 | 213 |
| LRR-III   | AT5G61570 | 213 |
| LRR-II    | AT2G13790 | 215 |
| LRR-II    | AT2G13800 | 215 |
| LRR-VIb   | AT2G40270 | 215 |
| LRR-VIIIa | AT5G49760 | 215 |
| LRR-VIIIb | AT1G53430 | 215 |
| LRR-III   | AT5G16590 | 216 |
| LRR-III   | AT2G27060 | 218 |
| LRR-VIa   | AT5G14210 | 218 |
| LRR-III   | AT4G23740 | 222 |

|         |           |     |
|---------|-----------|-----|
| LRR-VII | AT1G12460 | 222 |
| LRR-Xb  | AT5G07280 | 222 |
| LRR-III | AT2G42290 | 224 |
| LRR-III | AT5G43020 | 224 |
| LRR-I   | AT5G16900 | 227 |
| LRR-V   | AT1G53730 | 227 |
| LRR-V   | AT4G03390 | 227 |
