# Supplementary material for: The Arabidopsis LRR-RLK, PXC1, is a regulator of secondary wall formation correlated with the TDIF-PXY/TDR-WOX4 signaling pathway
Source: PubMed Central journal article supplement (PMC3716795; doi:10.1186/1471-2229-13-94), 2013-07-01

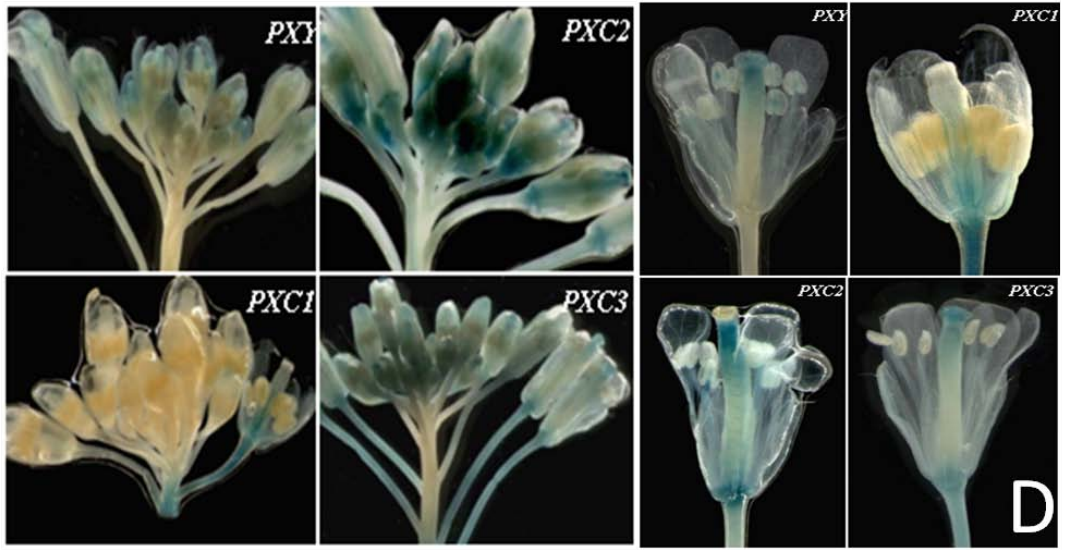

Supplement: 1471-2229-13-94-S3.pdf [file 1471-2229-13-94-S3.pdf]
