# Supplementary material for: The Arabidopsis LRR-RLK, PXC1, is a regulator of secondary wall formation correlated with the TDIF-PXY/TDR-WOX4 signaling pathway
Source: PubMed Central journal article supplement (PMC3716795; doi:10.1186/1471-2229-13-94), 2013-07-01
Supplement: 1471-2229-13-94-S5.pdf [file 1471-2229-13-94-S5.pdf]

**Additional file 5.** Inflorescence height (mm) in WT, *pxc1* mutants after bolting. Thirty plants were included in each group and the average data were shown. \* $P < 0.05$  and \*\* $P < 0.01$ .

| Days after bolting | Inflorescence height (mm) |               |               |               |
|--------------------|---------------------------|---------------|---------------|---------------|
|                    | WT                        | <i>pxc1-1</i> | <i>pxc1-2</i> | <i>pxc1-3</i> |
| 3                  | 52±17                     | 57±17         | 45±17         | 63±15*        |
| 4                  | 98±23                     | 103±25        | 88±25         | 111±20*       |
| 5                  | 137±22                    | 146±27        | 128±28        | 154±22*       |
| 6                  | 173±20                    | 185±25        | 165±26        | 190±21**      |
| 7                  | 205±19                    | 218±24*       | 200±24        | 222±20**      |
| 8                  | 229±14                    | 248±22**      | 234±24        | 254±15**      |
| 10                 | 273±12                    | 292±25**      | 283±25        | 292±17**      |
| 12                 | 309±12                    | 333±23**      | 323±28        | 333±22**      |
| 14                 | 331±15                    | 359±22**      | 351±31*       | 364±22**      |
| 17                 | 346±17                    | 379±24**      | 378±23**      | 390±27**      |
| 21                 | 350±18                    | 386±25**      | 387±20**      | 411±32**      |
