# Supplementary material for: The Arabidopsis LRR-RLK, PXC1, is a regulator of secondary wall formation correlated with the TDIF-PXY/TDR-WOX4 signaling pathway
Source: PubMed Central journal article supplement (PMC3716795; doi:10.1186/1471-2229-13-94), 2013-07-01
Supplement: 1471-2229-13-94-S6.pdf [file 1471-2229-13-94-S6.pdf]

## Primers for qRT-PCR

| Gene               | AGI number | Primer                             | Sequence (5'→3')                                 |
|--------------------|------------|------------------------------------|--------------------------------------------------|
| <i>PXY/TDR</i>     | At5g61480  | At5g61480.rt.F1<br>At5g61480.rt.R1 | TCAAACCGACGAATCCATGTC<br>CACGACCTACCCATGCTTTTG   |
| <i>AtPXC1</i>      | At2g36570  | AtPXC1.rt.F2<br>AtPXC1.rt.R2       | GGCTTAAAGACGCGAATCCAT<br>ATCCTCGTCGTCCAATCCAAT   |
| <i>WOX4</i>        | At1g46480  | AtWOX4.rt.F1<br>AtWOX4.rt.R1       | AAAGCAGCTTCACGACCACT<br>TCCTTCTCCACCATTGGTTC     |
| <i>AtCLE41</i>     | At3g24770  | AtCLE41.rt.F1<br>AtCLE41.rt.R1     | TGCATGGCAACATCAAATGAC<br>ACTGATGACGAGTCATGGGGA   |
| <i>AtCLE44</i>     | At4g13195  | AtCLE44.rt.F1<br>AtCLE44.rt.R1     | TGGATATTGAGCCCTGCTTGA<br>AGGAACCTCTTGGAAGGAGCC   |
| <i>HB8</i>         | At4g32880  | At4g32880.rt.F1<br>At4g32880.rt.R1 | ATCAGCTAAGTGGCTTGCGTC<br>CTTGAAGTGCCACCAACGTCG   |
| <i>HB15/CORONA</i> | At1g52150  | At1g52150.rt.F1<br>At1g52150.rt.R1 | AAGTATCTAGCCCAAACCGAAC<br>ACCTCGAACATACTGCCTAGC  |
| <i>REV</i>         | At5g60690  | At5g60690.rt.F1<br>At5g60690.rt.R1 | TAAAATGGAGATGGCGGTGGC<br>CTGCGGTTCTGAAACCAGAC    |
| <i>18s</i>         |            | 18s univ.F<br>18s univ.R           | CTATCAACTTTTCGATGGTAGG<br>CCGTGTCAGGATTGGGTAATTT |
| <i>EF1a</i>        | At5g60390  | EF1a.F<br>EF1a.R                   | TGGTGACGCTGGTATGGTTA<br>TCCTTCTTGTCCACGCTCTT     |
